# Supplementary material for: Thermodynamic signatures of quantum criticality in cuprate superconductors
Source: Springer Nature journal article supplement (doi:10.1038/s41586-019-0932-x), 2019-02-13
Supplement: MOESM1 [file 41586_2019_932_MOESM1_ESM.pdf]

In the format provided by the authors and unedited.

# Thermodynamic signatures of quantum criticality in cuprate superconductors

B. Michon<sup>1,2,3</sup>, C. Girod<sup>1,2,3</sup>, S. Badoux<sup>2</sup>, J. Kačmarčík<sup>4</sup>, Q. Ma<sup>5</sup>, M. Dragomir<sup>6</sup>, H. A. Dabkowska<sup>6</sup>, B. D. Gaulin<sup>5,6,7</sup>, J.-S. Zhou<sup>8</sup>, S. Pyon<sup>9</sup>, T. Takayama<sup>9</sup>, H. Takagi<sup>9</sup>, S. Verret<sup>2</sup>, N. Doiron-Leyraud<sup>2</sup>, C. Marcenat<sup>10</sup>, L. Taillefer<sup>2,7\*</sup> & T. Klein<sup>1,3\*</sup>

<sup>1</sup>Institut Néel, Université Grenoble Alpes, Grenoble, France. <sup>2</sup>Institut quantique, Département de physique and RQMP, Université de Sherbrooke, Sherbrooke, Québec, Canada. <sup>3</sup>CNRS, Institut Néel, Grenoble, France. <sup>4</sup>Institute of Experimental Physics, Slovak Academy of Sciences, Košice, Slovakia. <sup>5</sup>Department of Physics and Astronomy, McMaster University, Hamilton, Ontario, Canada. <sup>6</sup>Brockhouse Institute for Materials Research, McMaster University, Hamilton, Ontario, Canada. <sup>7</sup>Canadian Institute for Advanced Research, Toronto, Ontario, Canada. <sup>8</sup>Materials Science and Engineering Program, Department of Mechanical Engineering, University of Texas at Austin, Austin, Texas, USA. <sup>9</sup>Department of Advanced Materials Science, University of Tokyo, Kashiwa, Japan. <sup>10</sup>Université Grenoble Alpes, CEA, INAC, PHELIQS, LATEQS, Grenoble, France. \*e-mail: [louis.taillefer@usherbrooke.ca](mailto:louis.taillefer@usherbrooke.ca); [thierry.klein@neel.cnrs.fr](mailto:thierry.klein@neel.cnrs.fr)

## SUPPLEMENTARY INFORMATION

### **Thermodynamic signatures of quantum criticality in cuprate superconductors**

B. Michon *et al.*

#### **CONTENTS**

**Supplementary Figure 1**

**Supplementary Figure 2**

**Supplementary Figure 3**

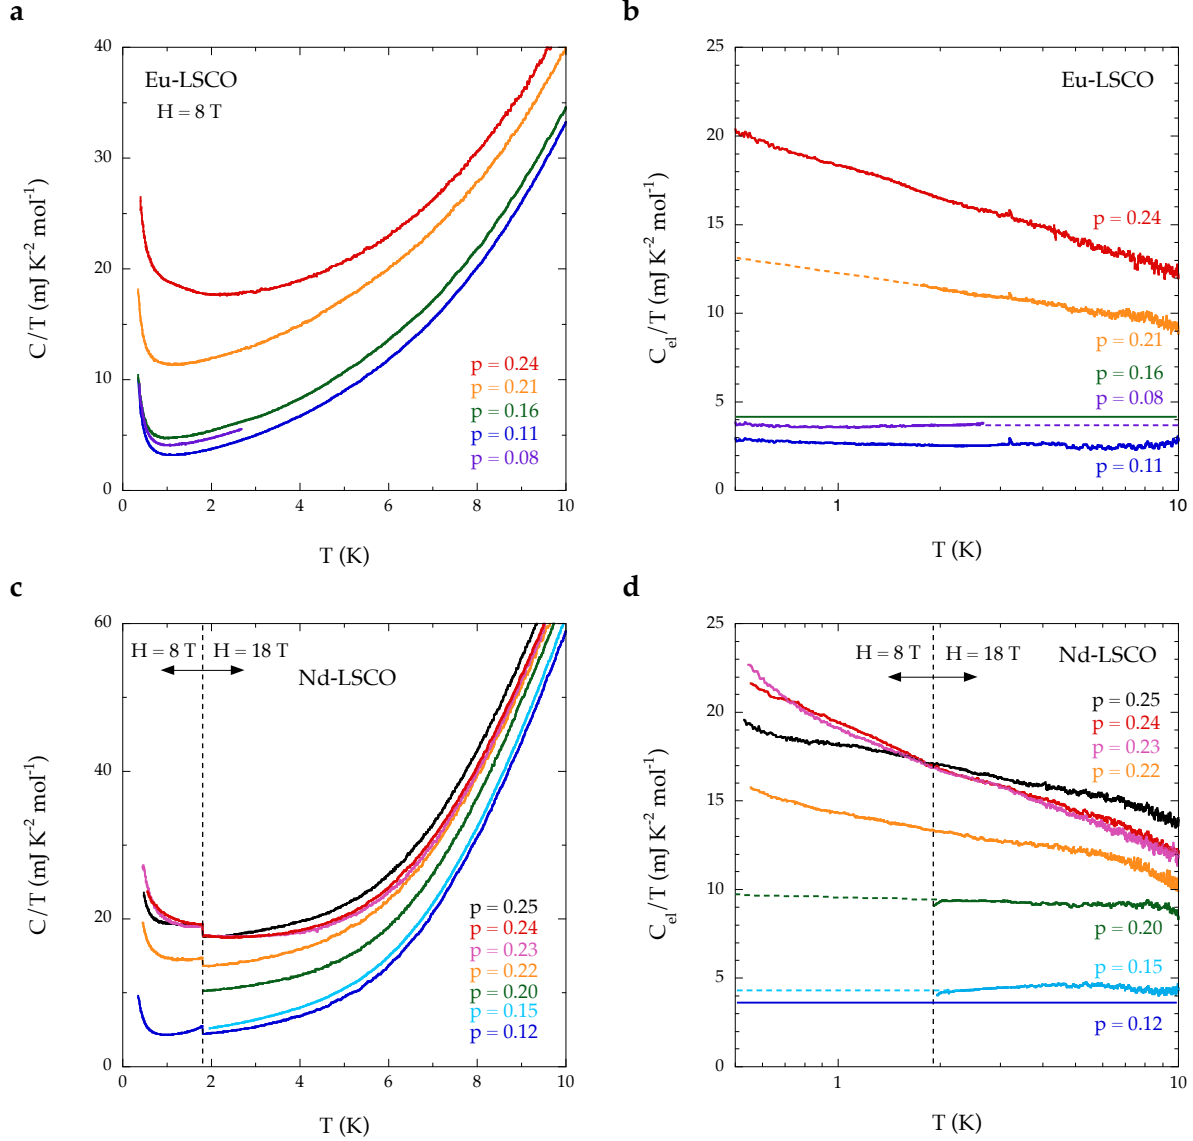

**Supplementary Fig. 1 | Specific heat data for all crystals of Eu-LSCO and Nd-LSCO.**

**a)** Specific heat of our five Eu-LSCO crystals measured in a field  $H = 8$  T, down to 0.4 K. The rapid rise below 1 K is a nuclear Schottky anomaly ( $C_{\text{nuclear}}$ ). **b)** Electronic specific heat  $C_{\text{el}}(T)$  of those five Eu-LSCO crystals, plotted as  $C_{\text{el}}/T$  vs  $\log T$ , from data at  $H = 8$  T ( $p = 0.08, 0.11, 0.16$ , and  $0.24$ ) and at  $H = 18$  T ( $p = 0.21$ ).  $C_{\text{el}}(T)$  is defined as  $C_{\text{el}}(p; T) = C(p; T) - C(p=0.16; T) + \gamma$ , where  $\gamma = 4.2$  mJ /K<sup>2</sup> mol is the residual linear term of the  $p = 0.16$  reference data ( $C/T = \gamma + \beta T^2$ , in Fig. 2a). Dashed lines are a linear extrapolation of the data ( $p = 0.21$ , orange;  $p = 0.08$ , purple). **c)** Same as panel **a**, for our seven Nd-LSCO crystals ( $H = 8$  T, below the dashed line;  $H = 18$  T, above the dashed line). **d)** Same as panel **b**, for those seven crystals, using data at  $p = 0.12$  as the reference curve for subtraction, with  $\gamma = 3.6$  mJ /K<sup>2</sup> mol (Fig. 2c).

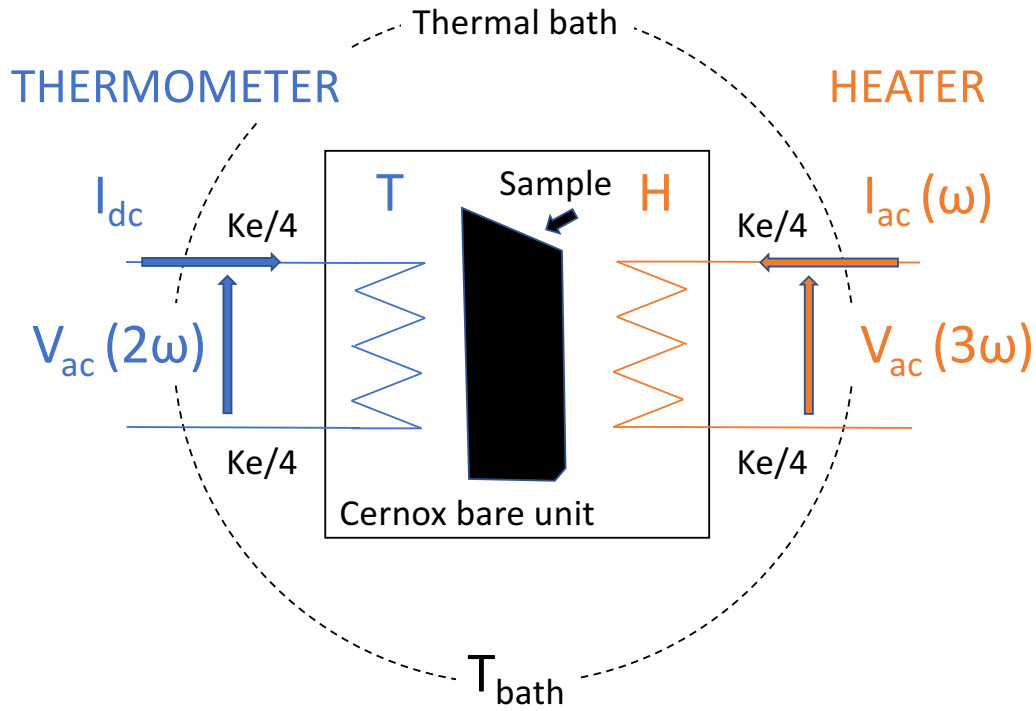

**Supplementary Fig. 2 | Experimental setup for the measurement of heat capacity.**

Sketch of our experimental setup, showing the bare Cernox chip (black square) suspended by four PtW wires. A shallow groove is made with a wire saw to obtain two independent sides, one for the heater (H, right side) and one for the thermometer (T, left side). The sample is glued with a minute amount of Apiezon grease on the back of the sapphire substrate. An AC current  $I_{ac}$  at a frequency  $\omega$  is applied across the heater to induce temperature oscillations of the small platform (sample + Cernox). A DC current  $I_{dc}$  is applied across the thermometer whose voltage is demodulated at  $2\omega$  (see METHODS – Specific heat measurements).

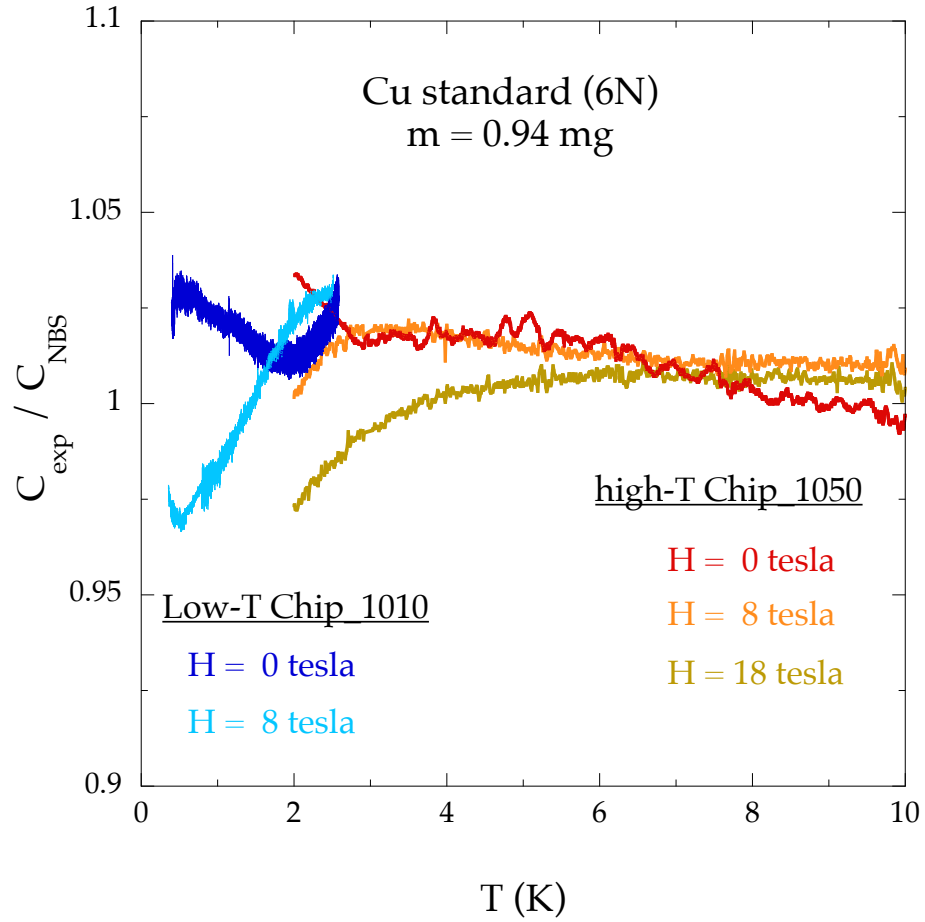

**Supplementary Fig. 3 | Test of our specific heat measurement on a Cu sample.**

Specific heat  $C_{\text{exp}}$  of a sample of copper measured using the same setup and analysis as used for our samples of Eu-LSCO and Nd-LSCO, plotted as  $C_{\text{exp}} / C_{\text{NBS}}$  vs  $T$ , where  $C_{\text{NBS}}$  is the standard value of the specific heat of copper established by the National Bureau of Standards. The measured data never deviate by more than 2-3 % from the standard, over the full temperature range from 0.5 K to 10 K, whether taken in the  $^4\text{He}$  refrigerator at  $H = 0, 8$  and  $18$  T (using a Cernox 1050 thermometer) or the  $^3\text{He}$  refrigerator at  $H = 0$  and  $8$  T (using a Cernox 1010 thermometer).
